# Supplementary material
Source: publisher site journal article supplement (https://www.dovepress.com/article/421830)
Supplement: Supplementary file 1 [file get_supplementary_file.php]

Supplementary Table 1 Clinical information on the TIA/MIS and Control Group

|  | TIA/MIS Group (n=84) | Control group (n=28) | *P* value | |
| --- | --- | --- | --- | --- |
| Age (years) (‾x±s) | 61.94 ± 8.08 | 57.64 ± 9.16 | | 0.016 |
| Females (n [%]) | 26 (31.0) | 15 (53.6) | | 0.054 |
| Education (years) |  |  | | 0.004 |
| ≤ 6 | 22 | 1 | |  |
| ≤ 12 | 51 | 19 | |  |
| > 12 | 11 | 8 | |  |
| Diabetes mellitus (n [%]) | 34 (40.5) | 9 (32.1) | | 0.575 |
| Hypertension (n [%]) | 63 (75.0) | 19(67.9) | | 0.622 |
| Hyperlipemia (n [%]) | 22 (26.2) | 14 (50.0) | | 0.035 |
| Coronary heart disease (n [%]) | 16 (19.0) | 8 (28.6) | | 0.425 |
| Alcohol (n [%]) | 33 (39.3) | 6 (21.4) | | 0.137 |
| Smoking (n [%]) | 35 (41.7) | 9 (32.1) | | 0.503 |
| Abnormal scale |  |  | |  |
| BNT (n [%]) | 16 (19.0) |  | |  |
| AVLT (n [%]) | 43 (51.2) |  | |  |
| TMT-A (n [%]) | 39 (46.4) |  | |  |
| TMT-B (n [%]) | 38 (45.2) |  | |  |
| Fazekas PV |  |  | | <0.001 |
| 0 (n [%]) | 1 (1.2) | 10 (35.7) | |  |
| 1 (n [%]) | 43 (51.2) | 17 (60.7) | |  |
| 2 (n [%]) | 27 (32.1) | 1 (3.6) | |  |
| 3 (n [%]) | 13 (15.5) | 0 (0) | |  |
| Fazekas DWM |  |  | | <0.001 |
| 0 (n [%]) | 7 (8.3) | 12 (42.9) | |  |
| 1 (n [%]) | 44 (52.4) | 14 (50.00) | |  |
| 2 (n [%]) | 26 (31.00) | 2 (7.1) | |  |
| 3 (n [%]) | 7 (8.3) | 0 (0) | |  |
| LDL (mmol/L) | 2.81 ± 1.01 | 3.12 ± 1.04 | | 0.088 |
| HDL (mmol/L) | 1.08 ± 0.24 | 1.20 ± 0.31 | | 0.074 |
| HCY (μmol/L) | 13.55 ± 7.24 | 12.45 ± 6.13 | | 0.247 |
| UA (μmol/L) | 323.37 ± 84.69 | 339.37 ± 99.45 | | 0.457 |
| Vitamin B12 (pg/mL) | 403.83 ± 253.60 | 467.30 ± 196.29 | | 0.057 |

In the TIA/MIS group, 81 patients underwent low-density lipoprotein (LDL) testing, 80 underwent high-density lipoprotein (HDL) testing, 75 underwent homocysteine (HCY) testing, 82 underwent uric acid (UA) testing, and 63 underwent vitamin B12 testing. In the control group, 27 participants underwent LDL and HDL testing, 25 underwent HCY testing, 27 underwent UA testing, and 20 underwent vitamin B12 testing. PV, periventricular; and DWM, deep white matter.

Reproduced with permission from Dove Medical Press. Miao M, Yuan F, Ma X, Yang H, Gao X, Zhu Z, et al. Methylation of the *RIN3* Promoter is Associated with Transient Ischemic Stroke/Mild Ischemic Stroke with Early Cognitive Impairment [published correction appears in Neuropsychiatr Dis Treat. 2021 Oct 07;17:3081-3083]. *Neuropsychiatr Dis Treat*. 2021;17:2587-2598.

Supplementary Table 2 Clinical Information on the TIA/MIS with and without ECI Groups

|  | ECI group (n=55) | Non-ECI group  （n=29） | *P* value |
| --- | --- | --- | --- |
| Age (years) (‾x±s) | 63.47 ± 6.95 | 59.03 ± 9.32 | 0.029 |
| female (n [%]) | 20 (36.4) | 6 (20.7) | 0.219 |
| Education (years) |  |  | 0.001 |
| ≤ 6 | 20 | 2 |  |
| ≤ 12 | 31 | 20 |  |
| > 12 | 4 | 7 |  |
| Diabetes mellitus (n [%]) | 21 (38.2) | 13 (44.8) | 0.722 |
| Hypertension (n [%]) | 38 (69.1) | 25 (86.2） | 0.145 |
| Hyperlipemia (n [%]) | 14 (25.5) | 8 (27.6) | 1 |
| Coronary heart disease (n [%]) | 14 (25.5) | 2 (6.9) | 0.077 |
| TOAST |  |  | 0.077 |
| Large artery atherosclerosis (n [%]) | 26 (47.3) | 7 (24.1) |  |
| Small artery occlusion (n [%]) | 29 (52.7) | 22 (75.9) |  |
| Alcohol (n [%]) | 22 (40.0) | 11 (37.9) | 1 |
| Smoking (n [%]) | 24 (43.6) | 11 (37.9) | 0.786 |
| Abnormal scale |  |  |  |
| BNT (n [%]) | 16 (29.1) |  |  |
| AVLT (n [%]) | 43 (78.2) |  |  |
| TMT-A (n [%]) | 39 (70.9) |  |  |
| TMT-B (n [%]) | 38 (69.1) |  |  |
| NIHSS |  |  | 0.935 |
| 0 (n [%]) | 26 (47.3) | 14 (48.3) |  |
| 1 (n [%]) | 14 (25.5) | 7 (24.1) |  |
| 2 (n [%]) | 10 (18.2) | 5 (17.2) |  |
| 3 (n [%]) | 4 (7.3) | 2 (6.9) |  |
| 4 (n [%]) | 1 (1.8) | 1 (3.4) |  |
| Fazekas PV |  |  | 0.661 |
| 0 (n [%]) | 1 (1.8) | 0 (0) |  |
| 1 (n [%]) | 26 (47.3) | 17 (58.6) |  |
| 2 (n [%]) | 19 (34.5) | 8 (27.6) |  |
| 3 (n [%]) | 9 (16.4) | 4 (13.8) |  |
| Fazekas DWM |  |  | 0.063 |
| 0 (n [%]) | 3 (5.5) | 4 (13.8) |  |
| 1 (n [%]) | 26 (47.3) | 18 (62.1) |  |
| 2 (n [%]) | 20 (36.4) | 6 (20.7) |  |
| 3 (n [%]) | 6 (10.9) | 1 (3.4) |  |
| LDL (mmol/L) | 2.78 ± 1.09 | 2.87 ± 0.84 | 0.483 |
| HDL (mmol/L) | 1.10 ± 0.24 | 1.05 ± 0.26 | 0.189 |
| HCY (μmol/L) | 14.15 ± 8.00 | 12.35 ± 5.37 | 0.320 |
| UA (μmol/L) | 310.93 ± 79.27 | 347.36 ± 90.98 | 0.079 |
| Vitamin B12 (pg/mL) | 411.61 ± 266.67 | 389.32 ± 232.57 | 0.784 |

In the cognitive-impairment group, 54 patients underwent low-density lipoprotein (LDL) testing, 53 patients underwent high-density lipoprotein (HDL) testing, 50 underwent homocysteine (HCY) testing, 54 underwent uric acid (UA) testing, and 41 underwent vitamin B12 testing. In the non-cognitive-impairment group, 27 patients underwent LDL and HDL testing, 25 underwent HCY testing, 28 underwent UA testing, and 22 underwent vitamin B12 testing. PV, periventricular; DWM, deep white matter; NIHSS, National Institutes of Health Stroke Scale; and TOAST, Trial of Org 10172 in acute stroke treatment

Reproduced with permission from Dove Medical Press. Miao M, Yuan F, Ma X, Yang H, Gao X, Zhu Z, et al. Methylation of the *RIN3* Promoter is Associated with Transient Ischemic Stroke/Mild Ischemic Stroke with Early Cognitive Impairment [published correction appears in Neuropsychiatr Dis Treat. 2021 Oct 07;17:3081-3083]. *Neuropsychiatr Dis Treat*. 2021;17:2587-2598.

Supplementary Table 3 Clinical Information on LA and SA Groups

|  | LA Group (n=33) | SA Group (n=51) | *P* value |
| --- | --- | --- | --- |
| Age (years) (‾x±s) | 64.42 ± 7.48 | 60.33 ± 8.11 | 0.021 |
| female (n [%]) | 10 (30.3) | 16 (31.4) | 1 |
| Education (years) |  |  | 0.805 |
| ≤ 6 | 9 | 13 |  |
| ≤ 12 | 20 | 31 |  |
| > 12 | 4 | 7 |  |
| Diabetes mellitus (n [%]) | 15 (45.5) | 19 (37.3) | 0.603 |
| Hypertension (n [%]) | 25 (75.8) | 38(74.5) | 1 |
| Hyperlipemia (n [%]) | 8 (24.2) | 14 (27.5) | 0.942 |
| Coronary heart disease (n [%]) | 6 (18.2) | 10 (19.6) | 1 |
| Alcohol (n [%]) | 14 (42.4) | 19 (37.3) | 0.806 |
| Smoking (n [%]) | 18 (54.5) | 17 (33.3) | 0.089 |
| Abnormal scale | 26 (78.8) | 29 (56.9) | 0.067 |
| Fazekas score |  |  | 0.747 |
| 0 (n [%]) | 1 (3.0) | 0(0) |  |
| 1 (n [%]) | 0 (0) | 6 (11.8) |  |
| 2 (n [%]) | 12(36.4) | 18 (35.3) |  |
| 3 (n [%]) | 6 (18.2) | 14 (27.5) |  |
| 4 (n [%]) | 11 (33.3) | 4 (7.8) |  |
| 5 (n [%]) | 1(3.0) | 4 (7.8) |  |
| 6 (n [%]) | 2 (6.1) | 5 (9.8) |  |
| LDL (mmol/L) | 2.71 ± 1.22 | 2.87 ± 0.86 | 0.216 |
| HDL (mmol/L) | 1.01 ± 0.20 | 1.13 ± 0.26 | 0.035 |
| HCY (μmol/L) | 13.01 ± 3.64 | 13.91 ± 8.90 | 0.572 |
| UA (μmol/L) | 301.78 ± 69.22 | 337.18 ± 91.24 | 0.050 |
| Vitamin B12 (pg/mL) | 370.33 ± 230.11 | 420.57 ± 265.63 | 0.435 |

In the large atherosclerosis (LA) group, 32 patients underwent low-density lipoprotein (LDL) testing, 31 patients underwent high-density lipoprotein (HDL) testing, 30 underwent homocysteine (HCY) testing, 32 underwent uric acid (UA) testing, and 21 underwent vitamin B12 testing. In the small artery occlusion (SA) group, 49 patients underwent LDL and HDL testing, 45 underwent HCY testing, 50 underwent UA testing, and 42 underwent vitamin B12 testing.
